# Supplementary material for: Clinical, Pathological and Prognostic Features of Rare BRAF Mutations in Metastatic Colorectal Cancer (mCRC): A Bi-Institutional Retrospective Analysis (REBUS Study)
Source: MDPI journal article supplement (doi:10.3390/cancers13092098), 2021-04-27
Supplement: s1 [file s1]

# Clinical, Pathological and Prognostic Features of Rare BRAF Mutations in Metastatic Colorectal Cancer (mCRC): A Bi-Institutional Retrospective Analysis (REBUS Study)

Maria Alessandra Calegari, Lisa Salvatore, Brunella Di Stefano, Michele Basso, Armando Orlandi, Alessandra Boccaccino, Fiorella Lombardo, Alessandra Auriemma, Ina Valeria Zurlo, Maria Bensi, Floriana Camarda, Marta Ribelli, Raffaella Vivolo, Alessandra Cocomazzi, Carmelo Pozzo, Michele Milella, Maurizio Martini, Emilio Bria and Giampaolo Tortora

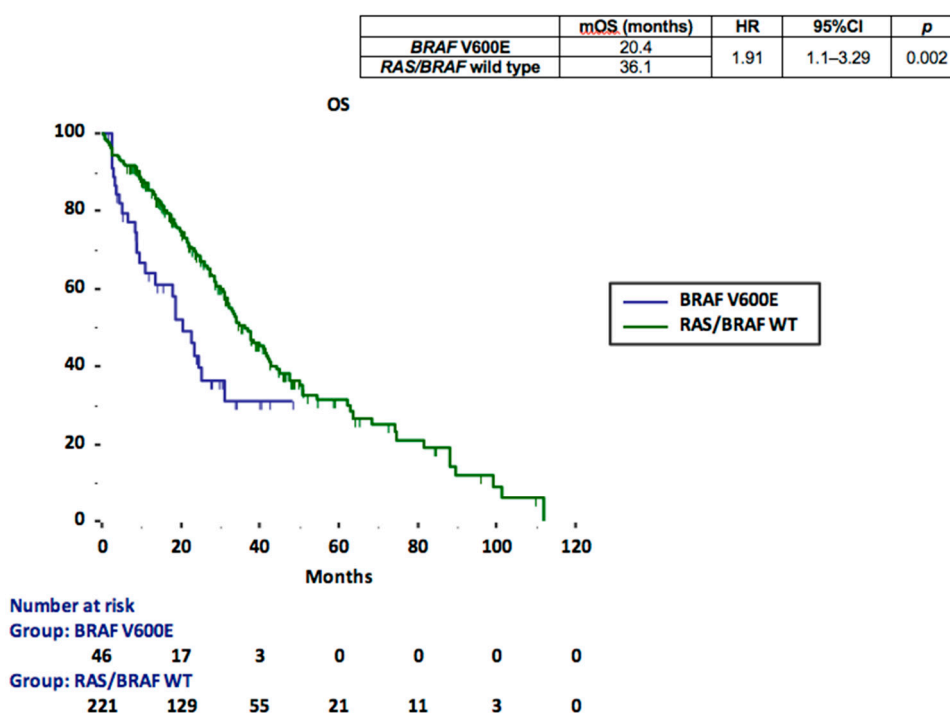

Figure S1: Kaplan-Meier OS curves for *BRAF* V600E cohort vs *RAS/BRAF* wild type dataset

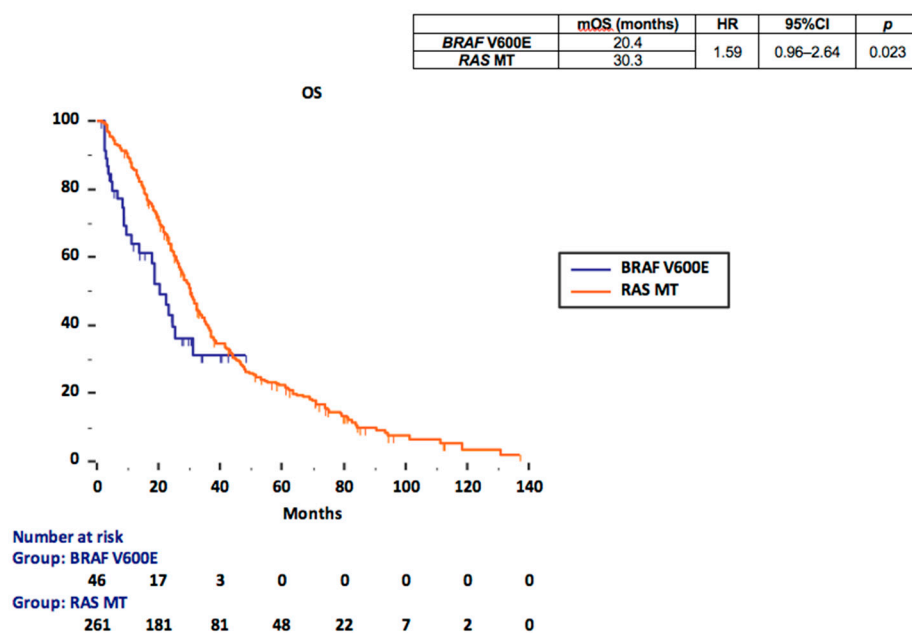

Figure S2: Kaplan-Meier OS curves for *BRAF* V600E cohort vs *RAS* mutated dataset

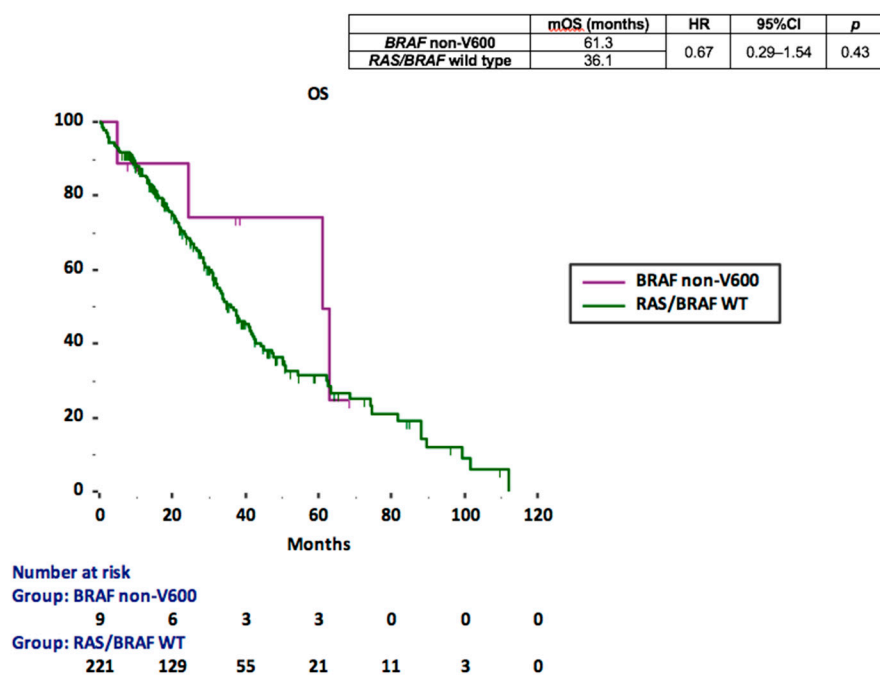

Figure S3: Kaplan-Meier OS curves for *BRAF* nonV600 cohort vs *RAS* mutated dataset

|                      | mOS (months) | HR   | 95%CI     | p   |
|----------------------|--------------|------|-----------|-----|
| <i>BRAF</i> non-V600 | 61.3         | 0.53 | 0.25–1.11 | 0.2 |
| <i>RAS</i> MT        | 30.3         |      |           |     |

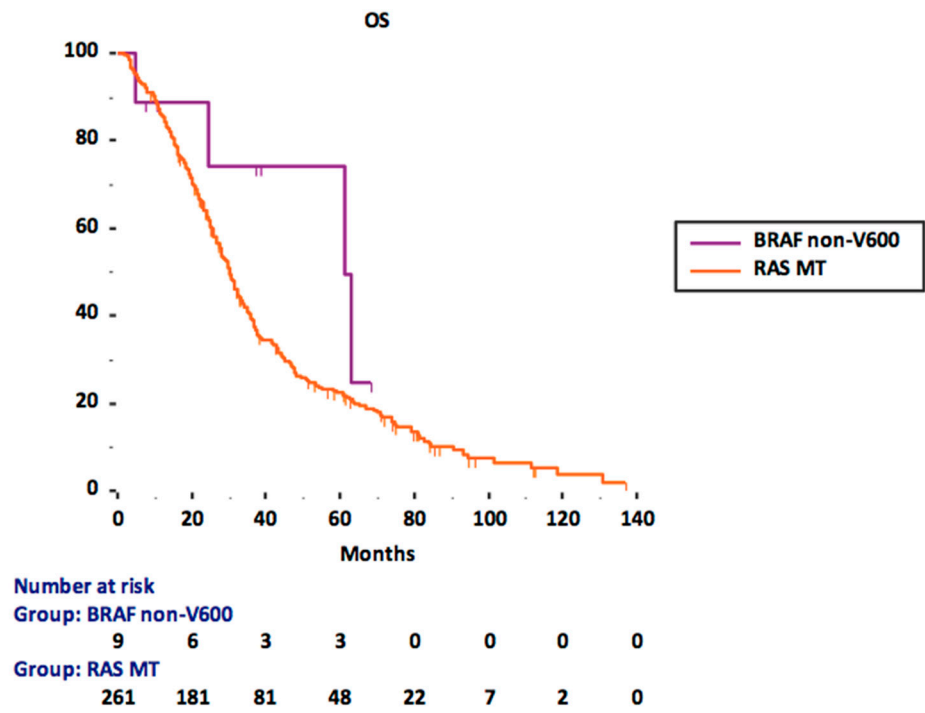

Figure S4: Kaplan-Meier OS curves for *BRAF* nonV600 cohort vs *RAS*/*BRAF* wild type dataset
